# Supplementary material for: Representing Low-Intensity Fire Sensible Heat Output in a Mesoscale Atmospheric Model with a Canopy Submodel: A Case Study with ARPS-CANOPY (version 5.2.12)
Source: Copernicus journal article supplement (doi:10.5194/gmd-2021-334), 2021-11-03
Supplement: Supplementary file 1 [file gmd-2021-334-supplement.pdf]

Table S1a. As in Table 3 (% MD), but for TWR<sub>C</sub>. Recall from Sect. 4.3 that lower tower level *T* is masked.

| Simulation                          | <i>T</i>            | <i>WS</i>        | <i>VV</i>         | <i>TKE</i>       |
|-------------------------------------|---------------------|------------------|-------------------|------------------|
| HFP <sub>2.4L</sub>                 | ---, -229.0, -125.8 | 42.6, 43.6, 16.6 | -15.0, -2.9, -4.8 | 7.4, -4.9, -16.8 |
| HFP <sub>4.8L</sub>                 | ---, -229.2, -126.0 | 43.5, 43.8, 16.6 | -15.2, -3.0, -4.6 | 6.9, -4.9, -16.5 |
| HFP <sub>24L</sub>                  | ---, -227.4, -125.0 | 46.8, 43.3, 14.7 | -14.4, -1.3, -1.9 | 7.3, -5.8, -16.9 |
| HFP <sub>24H</sub>                  | ---, -227.3, -124.8 | 47.3, 43.6, 15.2 | -14.6, -1.5, -2.5 | 8.2, -5.6, -16.5 |
| HP <sub>400</sub>                   | ---, -228.8, -125.8 | 42.3, 43.2, 16.4 | -14.9, -2.6, -4.4 | 7.7, -5.1, -17.0 |
| SHF <sub>24</sub>                   | ---, -227.3, -124.8 | 46.1, 43.2, 14.9 | -14.6, -1.6, -2.5 | 7.0, -6.0, -17.3 |
| NF <sub>0</sub>                     | ---, -228.5, -125.5 | 41.1, 43.1, 16.5 | -14.9, -2.9, -5.1 | 7.2, -5.2, -17.1 |
| O <sub>max</sub> - O <sub>min</sub> | ---, 1.9, 2.7       | 0.8, 1.4, 4.3    | 0.8, 0.9, 1.1     | 0.9, 1.4, 5.1    |

Table S1b. As in Table 3 (% MD), but for TWR<sub>E</sub>.

| Simulation                          | <i>T</i>            | <i>WS</i>         | <i>VV</i>        | <i>TKE</i>          |
|-------------------------------------|---------------------|-------------------|------------------|---------------------|
| HFP <sub>2.4L</sub>                 | -7.9, -32.3, -38.3  | 20.5, 15.9, 13.6  | -2.0, -5.7, -3.4 | -4.6, -24.1, -29.0  |
| HFP <sub>4.8L</sub>                 | 18.7, -20.6, -34.7  | 40.8, 25.6, 17.9  | -0.1, -4.1, -2.7 | 5.2, -20.3, -27.9   |
| HFP <sub>24L</sub>                  | 143.3, 45.0, -5.4   | 107.2, 74.5, 30.5 | 9.2, 7.7, 4.9    | 60.3, 15.6, -19.8   |
| HFP <sub>24H</sub>                  | 53.9, 29.9, 12.3    | 120.0, 81.7, 34.9 | 6.0, 7.3, 8.0    | 60.7, 14.3, -20.1   |
| HP <sub>400</sub>                   | -21.9, -46.1, -35.5 | 12.1, 10.8, 13.2  | -4.4, -7.7, -3.4 | -10.8, -27.5, -28.8 |
| SHF <sub>24</sub>                   | 181.7, 30.9, -16.2  | 106.8, 71.5, 28.6 | 8.1, 4.6, 2.3    | 59.4, 11.5, -22.2   |
| NF <sub>0</sub>                     | -40.2, -44.9, -42.4 | -3.3, 0.8, 8.8    | -3.6, -7.1, -4.2 | -16.0, -28.8, -30.1 |
| O <sub>max</sub> - O <sub>min</sub> | 12.1, 11.3, 9.9     | 1.6, 1.6, 3.4     | 0.9, 1.5, 2.5    | 3.6, 3.4, 8.6       |

Table S1c. As in Table 3 (% MD), but for TWR<sub>F</sub>. Recall from Sect. 4.3 that lower tower level *T* is masked.

| Simulation                          | <i>T</i>          | <i>WS</i>         | <i>VV</i>        | <i>TKE</i>         |
|-------------------------------------|-------------------|-------------------|------------------|--------------------|
| HFP <sub>2.4L</sub>                 | ---, -20.6, -31.9 | 25.6, 6.5, 6.7    | 6.4, 6.4, 9.2    | 1.9, -22.0, -33.7  |
| HFP <sub>4.8L</sub>                 | ---, -12.2, -29.6 | 42.5, 14.0, 9.5   | 7.2, 5.8, 7.6    | 14.2, -16.6, -32.1 |
| HFP <sub>24L</sub>                  | ---, 35.7, -19.8  | 110.9, 41.6, 20.2 | 5.8, -0.3, -3.3  | 93.8, 12.3, -24.2  |
| HFP <sub>24H</sub>                  | ---, 16.4, -10.0  | 104.3, 46.9, 26.6 | -2.6, -4.4, -7.2 | 76.5, 14.3, -20.0  |
| HP <sub>400</sub>                   | ---, -32.9, -30.9 | 15.4, 3.4, 7.1    | 3.7, 4.6, 7.6    | -2.4, -23.6, -33.5 |
| SHF <sub>24</sub>                   | ---, 27.2, -24.1  | 107.4, 38.5, 19.0 | 9.4, 1.6, -1.7   | 97.5, 10.8, -24.9  |
| NF <sub>0</sub>                     | ---, -31.7, -35.2 | 2.0, -4.6, 1.5    | 4.2, 5.6, 8.6    | -9.6, -27.1, -35.8 |
| O <sub>max</sub> - O <sub>min</sub> | ---, 11.7, 10.0   | 1.5, 2.6, 4.1     | 0.5, 1.5, 1.5    | 2.5, 4.0, 8.4      |

Table S1d. As in Table 3 (% MD), but for TWR<sub>N</sub>.

| Simulation                          | <i>T</i>            | <i>WS</i>         | <i>VV</i>          | <i>TKE</i>          |
|-------------------------------------|---------------------|-------------------|--------------------|---------------------|
| HFP <sub>2.4L</sub>                 | -2.0, -7.9, -28.0   | 28.9, 2.2, -6.5   | 5.6, 3.6, 3.6      | 0.7, -18.0, -21.7   |
| HFP <sub>4.8L</sub>                 | 17.0, 0.4, -22.3    | 44.9, 14.4, 2.4   | 5.2, 3.0, 2.0      | 14.2, -13.7, -19.9  |
| HFP <sub>24L</sub>                  | 93.9, 27.8, -6.8    | 99.5, 46.6, 17.8  | -6.1, -11.7, -10.7 | 120.5, 17.2, -5.6   |
| HFP <sub>24H</sub>                  | 31.3, 25.9, -0.5    | 102.9, 55.4, 25.9 | -6.1, -13.3, -16.7 | 102.9, 18.2, -4.7   |
| HP <sub>400</sub>                   | 6.0, -9.3, -28.6    | 27.4, -0.7, -8.2  | 6.4, 4.3, 3.7      | 6.4, -18.7, -21.9   |
| SHF <sub>24</sub>                   | 108.7, 9.2, -13.9   | 106.9, 48.5, 19.9 | -7.7, -14.0, -13.9 | 151.7, 17.8, -6.5   |
| NF <sub>0</sub>                     | -32.9, -22.4, -34.4 | 3.4, -13.1, -16.8 | 6.9, 5.5, 6.4      | -16.4, -22.5, -24.7 |
| O <sub>max</sub> - O <sub>min</sub> | 12.0, 10.2, 8.9     | 1.6, 2.4, 3.6     | 0.8, 1.4, 1.5      | 1.5, 4.3, 7.2       |

Table S1e. As in Table 3 (% MD), but for TWR<sub>S</sub>. Recall from section 2: no middle tower level sonic anemometer.

| Simulation                          | <i>T</i>          | <i>WS</i>       | <i>VV</i>        | <i>TKE</i>        |
|-------------------------------------|-------------------|-----------------|------------------|-------------------|
| HFP <sub>2.4L</sub>                 | -21.2, ---, -42.4 | 14.7, ---, -2.5 | -7.0, ---, -0.5  | -12.3, ---, -40.6 |
| HFP <sub>4.8L</sub>                 | -15.8, ---, -41.4 | 24.5, ---, 0.3  | -8.6, ---, -2.7  | -3.1, ---, -41.3  |
| HFP <sub>24L</sub>                  | 17.1, ---, -41.0  | 50.0, ---, 8.1  | -12.6, ---, -8.6 | 28.3, ---, -37.7  |
| HFP <sub>24H</sub>                  | -10.9, ---, -29.8 | 51.1, ---, 11.6 | -13.5, ---, -9.5 | 23.7, ---, -36.1  |
| HP <sub>400</sub>                   | -18.6, ---, -42.1 | 9.6, ---, -4.2  | -5.9, ---, 0.9   | -13.5, ---, -39.5 |
| SHF <sub>24</sub>                   | 25.9, ---, -45.0  | 46.9, ---, 7.7  | -12.7, ---, -9.0 | 30.6, ---, -38.2  |
| NF <sub>0</sub>                     | -30.3, ---, -47.1 | 1.6, ---, -6.8  | -7.2, ---, -0.6  | -18.9, ---, -38.1 |
| O <sub>max</sub> - O <sub>min</sub> | 17.4, ---, 7.5    | 1.8, ---, 3.9   | 0.7, ---, 2.0    | 2.2, ---, 3.6     |

Table S2a. As in Table 4 (% RMSD), but for TWR<sub>C</sub>. Recall from Sect. 4.3 that lower tower level  $T$  is masked.

| Simulation                          | $T$               | $WS$             | $VV$             | $TKE$            |
|-------------------------------------|-------------------|------------------|------------------|------------------|
| HFP <sub>2.4L</sub>                 | ---, 232.0, 128.9 | 65.5, 58.4, 37.0 | 30.1, 23.7, 28.3 | 45.0, 36.7, 36.2 |
| HFP <sub>4.8L</sub>                 | ---, 232.2, 129.0 | 65.9, 58.7, 37.1 | 30.3, 23.9, 28.5 | 44.3, 36.9, 36.3 |
| HFP <sub>24L</sub>                  | ---, 230.8, 128.3 | 68.2, 58.6, 36.4 | 30.5, 24.8, 27.7 | 43.7, 37.5, 36.2 |
| HFP <sub>24H</sub>                  | ---, 230.6, 128.1 | 68.4, 58.9, 36.6 | 30.6, 24.7, 27.7 | 44.5, 37.7, 36.2 |
| HP <sub>400</sub>                   | ---, 231.7, 128.8 | 65.2, 57.9, 36.6 | 30.2, 23.6, 27.5 | 45.1, 36.6, 36.1 |
| SHF <sub>24</sub>                   | ---, 230.6, 128.1 | 68.2, 58.3, 36.1 | 30.4, 24.6, 28.0 | 44.1, 37.5, 36.2 |
| NF <sub>0</sub>                     | ---, 231.5, 128.6 | 65.3, 58.0, 36.8 | 29.9, 23.5, 28.0 | 45.1, 36.3, 36.0 |
| O <sub>max</sub> - O <sub>min</sub> | ---, 1.9, 2.7     | 0.8, 1.4, 4.3    | 0.8, 0.9, 1.1    | 0.9, 1.4, 5.1    |

Table S2b. As in Table 4 (% RMSD), but for TWR<sub>E</sub>.

| Simulation                          | $T$               | $WS$              | $VV$             | $TKE$            |
|-------------------------------------|-------------------|-------------------|------------------|------------------|
| HFP <sub>2.4L</sub>                 | 27.3, 43.3, 47.4  | 47.4, 46.0, 37.5  | 21.5, 27.1, 21.2 | 24.4, 34.3, 37.3 |
| HFP <sub>4.8L</sub>                 | 35.7, 37.2, 45.6  | 55.8, 48.3, 40.3  | 21.4, 28.1, 22.8 | 25.4, 31.9, 36.8 |
| HFP <sub>24L</sub>                  | 161.4, 74.7, 38.8 | 112.7, 83.8, 44.1 | 31.8, 39.2, 26.7 | 72.9, 37.7, 31.5 |
| HFP <sub>24H</sub>                  | 63.4, 49.5, 39.6  | 124.6, 89.6, 46.5 | 29.5, 39.0, 31.1 | 69.0, 36.6, 32.5 |
| HP <sub>400</sub>                   | 35.4, 53.7, 43.7  | 42.7, 43.9, 39.2  | 20.5, 25.9, 20.0 | 26.4, 36.4, 36.8 |
| SHF <sub>24</sub>                   | 206.5, 64.7, 41.0 | 112.3, 83.0, 43.8 | 30.2, 37.4, 27.9 | 66.5, 36.6, 33.6 |
| NF <sub>0</sub>                     | 47.2, 51.7, 49.6  | 41.5, 46.9, 38.3  | 20.5, 26.1, 21.2 | 26.3, 37.2, 38.2 |
| O <sub>max</sub> - O <sub>min</sub> | 12.1, 11.3, 9.9   | 1.6, 1.6, 3.4     | 0.9, 1.5, 2.5    | 3.6, 3.4, 8.6    |

Table S2c. As in Table 4 (% RMSD), but for TWR<sub>F</sub>. Recall from Sect. 4.3 that lower tower level  $T$  is masked.

| Simulation                          | $T$             | $WS$              | $VV$             | $TKE$             |
|-------------------------------------|-----------------|-------------------|------------------|-------------------|
| HFP <sub>2.4L</sub>                 | ---, 27.5, 35.2 | 42.6, 36.8, 33.4  | 21.3, 24.4, 32.8 | 31.6, 39.7, 45.7  |
| HFP <sub>4.8L</sub>                 | ---, 23.2, 33.7 | 52.5, 37.1, 32.7  | 23.7, 25.4, 34.4 | 33.9, 37.7, 45.4  |
| HFP <sub>24L</sub>                  | ---, 62.9, 29.9 | 114.8, 49.9, 31.1 | 39.6, 30.7, 28.8 | 102.4, 36.3, 40.8 |
| HFP <sub>24H</sub>                  | ---, 33.3, 18.3 | 107.6, 53.4, 34.6 | 29.3, 25.4, 27.1 | 82.8, 33.4, 38.3  |
| HP <sub>400</sub>                   | ---, 36.9, 33.7 | 38.6, 38.1, 33.9  | 19.9, 21.9, 29.5 | 31.1, 40.4, 45.1  |
| SHF <sub>24</sub>                   | ---, 63.9, 32.4 | 111.9, 47.4, 30.7 | 40.9, 31.4, 29.4 | 106.0, 36.0, 41.3 |
| NF <sub>0</sub>                     | ---, 38.1, 38.2 | 38.7, 39.1, 34.5  | 20.4, 22.6, 29.3 | 31.8, 41.9, 46.3  |
| O <sub>max</sub> - O <sub>min</sub> | ---, 11.7, 10.0 | 1.5, 2.6, 4.1     | 0.5, 1.5, 1.5    | 2.5, 4.0, 8.4     |

Table S2d. As in Table 4 (% RMSD), but for TWR<sub>N</sub>.

| Simulation                          | $T$               | $WS$              | $VV$             | $TKE$             |
|-------------------------------------|-------------------|-------------------|------------------|-------------------|
| HFP <sub>2.4L</sub>                 | 19.7, 23.4, 36.7  | 41.1, 29.0, 38.0  | 20.9, 24.0, 34.3 | 38.7, 31.4, 33.7  |
| HFP <sub>4.8L</sub>                 | 28.6, 22.6, 32.9  | 52.7, 31.3, 32.6  | 20.5, 24.4, 38.2 | 44.6, 29.1, 30.8  |
| HFP <sub>24L</sub>                  | 109.3, 55.8, 48.3 | 108.0, 56.8, 33.6 | 32.3, 42.7, 61.1 | 147.6, 36.0, 29.9 |
| HFP <sub>24H</sub>                  | 37.2, 32.4, 22.3  | 106.9, 62.3, 38.0 | 22.2, 28.1, 40.4 | 119.5, 37.3, 32.6 |
| HP <sub>400</sub>                   | 19.1, 21.1, 35.2  | 41.4, 27.5, 38.2  | 21.3, 22.7, 31.6 | 43.4, 32.3, 34.2  |
| SHF <sub>24</sub>                   | 124.5, 38.2, 39.7 | 115.3, 57.3, 34.5 | 30.0, 36.4, 49.0 | 174.3, 36.8, 31.3 |
| NF <sub>0</sub>                     | 38.3, 32.6, 40.9  | 38.2, 35.8, 40.1  | 25.2, 25.9, 32.4 | 38.2, 33.1, 35.6  |
| O <sub>max</sub> - O <sub>min</sub> | 12.0, 10.2, 8.9   | 1.6, 2.4, 3.6     | 0.8, 1.4, 1.5    | 1.5, 4.3, 7.2     |

Table S2e. As in Table 4 (% RMSD), but for TWR<sub>S</sub>. Recall from section 2: no middle tower level sonic anemometer.

| Simulation                          | $T$             | $WS$            | $VV$            | $TKE$           |
|-------------------------------------|-----------------|-----------------|-----------------|-----------------|
| HFP <sub>2.4L</sub>                 | 29.7, ---, 49.1 | 34.9, ---, 32.8 | 21.3, ---, 22.7 | 29.4, ---, 52.4 |
| HFP <sub>4.8L</sub>                 | 25.2, ---, 47.8 | 37.8, ---, 31.6 | 21.9, ---, 20.8 | 24.7, ---, 53.2 |
| HFP <sub>24L</sub>                  | 40.6, ---, 46.3 | 59.6, ---, 32.2 | 27.2, ---, 21.8 | 52.9, ---, 52.3 |
| HFP <sub>24H</sub>                  | 21.6, ---, 40.8 | 60.1, ---, 32.0 | 26.6, ---, 20.7 | 45.1, ---, 51.0 |
| HP <sub>400</sub>                   | 26.4, ---, 50.0 | 35.8, ---, 34.1 | 21.3, ---, 24.4 | 30.8, ---, 51.4 |
| SHF <sub>24</sub>                   | 51.7, ---, 49.3 | 56.7, ---, 32.4 | 28.0, ---, 22.3 | 57.0, ---, 52.7 |
| NF <sub>0</sub>                     | 39.8, ---, 52.4 | 39.8, ---, 36.9 | 22.1, ---, 21.8 | 37.5, ---, 51.2 |
| O <sub>max</sub> - O <sub>min</sub> | 17.4, ---, 7.5  | 1.8, ---, 3.9   | 0.7, ---, 2.0   | 2.2, ---, 3.6   |

Table S3a. As in Table 5 (IA), but for TWR<sub>C</sub>. Recall from Sect. 4.3 that lower tower level  $T$  is masked.

| Simulation          | $T$             | $WS$             | $VV$             | $TKE$            |
|---------------------|-----------------|------------------|------------------|------------------|
| HFP <sub>2.4L</sub> | ---, 0.14, 0.19 | 0.27, 0.25, 0.26 | 0.36, 0.30, 0.37 | 0.27, 0.24, 0.33 |
| HFP <sub>4.8L</sub> | ---, 0.14, 0.19 | 0.27, 0.25, 0.25 | 0.36, 0.30, 0.36 | 0.26, 0.23, 0.33 |
| HFP <sub>24L</sub>  | ---, 0.14, 0.19 | 0.24, 0.22, 0.30 | 0.32, 0.32, 0.43 | 0.22, 0.20, 0.35 |
| HFP <sub>24H</sub>  | ---, 0.14, 0.19 | 0.25, 0.22, 0.29 | 0.33, 0.31, 0.42 | 0.23, 0.20, 0.34 |
| HP <sub>400</sub>   | ---, 0.14, 0.19 | 0.28, 0.25, 0.27 | 0.36, 0.31, 0.41 | 0.27, 0.24, 0.34 |
| SHF <sub>24</sub>   | ---, 0.14, 0.19 | 0.24, 0.22, 0.29 | 0.33, 0.31, 0.40 | 0.23, 0.21, 0.35 |
| NF <sub>0</sub>     | ---, 0.14, 0.19 | 0.27, 0.25, 0.25 | 0.37, 0.30, 0.37 | 0.27, 0.25, 0.33 |

Table S3b. As in Table 5 (IA), but for TWR<sub>E</sub>.

| Simulation          | $T$              | $WS$             | $VV$             | $TKE$            |
|---------------------|------------------|------------------|------------------|------------------|
| HFP <sub>2.4L</sub> | 0.39, 0.38, 0.38 | 0.39, 0.36, 0.35 | 0.22, 0.32, 0.34 | 0.43, 0.46, 0.45 |
| HFP <sub>4.8L</sub> | 0.48, 0.35, 0.36 | 0.40, 0.40, 0.32 | 0.15, 0.22, 0.22 | 0.47, 0.47, 0.45 |
| HFP <sub>24L</sub>  | 0.15, 0.17, 0.46 | 0.29, 0.31, 0.32 | 0.27, 0.36, 0.50 | 0.23, 0.27, 0.47 |
| HFP <sub>24H</sub>  | 0.32, 0.24, 0.31 | 0.25, 0.32, 0.33 | 0.19, 0.23, 0.30 | 0.28, 0.29, 0.45 |
| HP <sub>400</sub>   | 0.36, 0.37, 0.39 | 0.38, 0.33, 0.23 | 0.25, 0.29, 0.25 | 0.40, 0.45, 0.47 |
| SHF <sub>24</sub>   | 0.13, 0.20, 0.39 | 0.28, 0.31, 0.32 | 0.27, 0.32, 0.36 | 0.33, 0.27, 0.43 |
| NF <sub>0</sub>     | 0.37, 0.38, 0.38 | 0.35, 0.30, 0.31 | 0.20, 0.29, 0.28 | 0.42, 0.45, 0.45 |

Table S3c. As in Table 5 (IA), but for TWR<sub>F</sub>. Recall from Sect. 4.3 that lower tower level  $T$  is masked.

| Simulation          | $T$             | $WS$             | $VV$             | $TKE$            |
|---------------------|-----------------|------------------|------------------|------------------|
| HFP <sub>2.4L</sub> | ---, 0.52, 0.33 | 0.31, 0.30, 0.37 | 0.69, 0.47, 0.38 | 0.19, 0.38, 0.46 |
| HFP <sub>4.8L</sub> | ---, 0.67, 0.36 | 0.34, 0.29, 0.40 | 0.66, 0.47, 0.35 | 0.24, 0.37, 0.45 |
| HFP <sub>24L</sub>  | ---, 0.26, 0.43 | 0.25, 0.41, 0.54 | 0.41, 0.47, 0.59 | 0.25, 0.47, 0.47 |
| HFP <sub>24H</sub>  | ---, 0.49, 0.64 | 0.26, 0.40, 0.53 | 0.56, 0.57, 0.66 | 0.29, 0.51, 0.49 |
| HP <sub>400</sub>   | ---, 0.43, 0.34 | 0.30, 0.28, 0.37 | 0.65, 0.49, 0.43 | 0.22, 0.39, 0.47 |
| SHF <sub>24</sub>   | ---, 0.26, 0.38 | 0.25, 0.42, 0.53 | 0.41, 0.45, 0.56 | 0.25, 0.45, 0.46 |
| NF <sub>0</sub>     | ---, 0.39, 0.31 | 0.32, 0.29, 0.34 | 0.60, 0.43, 0.42 | 0.24, 0.37, 0.47 |

Table S3d. As in Table 5 (IA), but for TWR<sub>N</sub>.

| Simulation          | $T$              | $WS$             | $VV$             | $TKE$            |
|---------------------|------------------|------------------|------------------|------------------|
| HFP <sub>2.4L</sub> | 0.60, 0.60, 0.41 | 0.45, 0.23, 0.26 | 0.53, 0.53, 0.38 | 0.34, 0.41, 0.44 |
| HFP <sub>4.8L</sub> | 0.58, 0.76, 0.53 | 0.42, 0.30, 0.35 | 0.63, 0.65, 0.46 | 0.18, 0.34, 0.47 |
| HFP <sub>24L</sub>  | 0.23, 0.49, 0.44 | 0.28, 0.31, 0.49 | 0.54, 0.51, 0.38 | 0.14, 0.30, 0.30 |
| HFP <sub>24H</sub>  | 0.52, 0.66, 0.72 | 0.30, 0.29, 0.40 | 0.67, 0.64, 0.52 | 0.20, 0.30, 0.31 |
| HP <sub>400</sub>   | 0.75, 0.69, 0.45 | 0.43, 0.30, 0.30 | 0.50, 0.53, 0.38 | 0.31, 0.43, 0.45 |
| SHF <sub>24</sub>   | 0.21, 0.61, 0.50 | 0.25, 0.31, 0.41 | 0.47, 0.51, 0.42 | 0.13, 0.31, 0.35 |
| NF <sub>0</sub>     | 0.38, 0.40, 0.39 | 0.38, 0.17, 0.32 | 0.29, 0.35, 0.31 | 0.34, 0.43, 0.43 |

Table S3e. As in Table 5 (IA), but for TWR<sub>S</sub>. Recall from section 2: no middle tower level sonic anemometer.

| Simulation          | $T$             | $WS$            | $VV$            | $TKE$           |
|---------------------|-----------------|-----------------|-----------------|-----------------|
| HFP <sub>2.4L</sub> | 0.55, ---, 0.37 | 0.52, ---, 0.42 | 0.57, ---, 0.48 | 0.55, ---, 0.40 |
| HFP <sub>4.8L</sub> | 0.68, ---, 0.38 | 0.58, ---, 0.43 | 0.54, ---, 0.53 | 0.77, ---, 0.40 |
| HFP <sub>24L</sub>  | 0.72, ---, 0.42 | 0.49, ---, 0.41 | 0.45, ---, 0.55 | 0.64, ---, 0.38 |
| HFP <sub>24H</sub>  | 0.80, ---, 0.45 | 0.50, ---, 0.47 | 0.48, ---, 0.62 | 0.68, ---, 0.39 |
| HP <sub>400</sub>   | 0.65, ---, 0.36 | 0.47, ---, 0.41 | 0.57, ---, 0.42 | 0.49, ---, 0.41 |
| SHF <sub>24</sub>   | 0.65, ---, 0.40 | 0.50, ---, 0.40 | 0.41, ---, 0.53 | 0.61, ---, 0.37 |
| NF <sub>0</sub>     | 0.43, ---, 0.36 | 0.33, ---, 0.38 | 0.47, ---, 0.46 | 0.39, ---, 0.39 |
